# Supplementary material for: Computational assessment of the crystallization tendency of 1-ethyl-3-methylimidazolium ionic liquids
Source: Royal Society of Chemistry journal article supplement (doi:10.1039/d0cp06083f), 2021-01-01
Supplement: d0cp06083f1.pdf [file d0cp06083f1.pdf]

# Computational Assessment of the Crystallization Tendency of 1-Ethyl-3-methylimidazolium Ionic Liquids

Supporting Information

*Ctirad Červinka\**, *Vojtěch Štejfa*

† Department of Physical Chemistry, University of Chemistry and Technology Prague,  
Technická 5, CZ-166 28 Prague 6, Czech Republic

\*Corresponding author: [cervinkc@vscht.cz](mailto:cervinkc@vscht.cz)

**TABLE S1**

Atomic charges parametrized in this work for the [HSO<sub>4</sub>] anion, using the CHELPG procedure and the B3LYP/aug-cc-pVTZ levels of theory.

| Atom type | Charge, $q_e$ |
|-----------|---------------|
| SO        | 1.389         |
| OS        | -0.696        |
| OH        | -0.649        |
| HO        | 0.348         |

**TABLE S2**

Overview of 1-ethyl-3-methylimidazolium ionic liquids included in this study along with their experimental unit-cell parameters  $a$ ,  $b$ ,  $c$ , and  $\beta$  and number of ion pairs forming the unit cell  $Z$ .

| Ionic liquid                             | CAS RN      | CSD refcode            | Space group        | $Z$ | $a$ , Å | $b$ , Å | $c$ , Å | $\beta$ , deg.      |
|------------------------------------------|-------------|------------------------|--------------------|-----|---------|---------|---------|---------------------|
| [emIm][Br]                               | 65039-08-9  | ZIBHUN01 <sup>1</sup>  | P2 <sub>1</sub> /c | 4   | 8.674   | 7.881   | 12.436  | 109.26              |
| [emIm][BF <sub>4</sub> ]                 | 143314-16-3 | LAZRIO01 <sup>2</sup>  | P2 <sub>1</sub> /c | 4   | 8.653   | 9.285   | 13.217  | 121.36              |
| [emIm][PF <sub>6</sub> ]                 | 155371-19-0 | HAYBUE02 <sup>3</sup>  | P2 <sub>1</sub> /c | 4   | 8.627   | 9.035   | 13.469  | 101.92              |
| [emIm][NO <sub>3</sub> ]                 | 143314-14-1 | KUCPED <sup>4</sup>    | P2 <sub>1</sub> /n | 4   | 4.540   | 14.810  | 13.445  | 95.74               |
| [emIm][SCN]                              | 331717-63-6 |                        |                    |     |         |         |         |                     |
| [emIm][DCA]                              | 370865-89-7 |                        |                    |     |         |         |         |                     |
| [emIm][TCM]                              | 666823-18-3 |                        |                    |     |         |         |         |                     |
| [emIm][MeSO <sub>3</sub> ]               | 145022-45-3 | SAGPOJ <sup>5</sup>    | P2 <sub>1</sub> /a | 4   | 12.020  | 14.978  | 5.583   | 95.75               |
| [emIm][HSO <sub>4</sub> ]                | 412009-61-1 | WAKDAR <sup>6</sup>    | Pb2 <sub>1</sub> a | 4   | 15.918  | 7.923   | 7.419   | 90.00               |
| [emIm][MeSO <sub>4</sub> ]               | 516474-01-4 |                        |                    |     |         |         |         |                     |
| [emIm][EtSO <sub>4</sub> ]               | 342573-75-5 |                        |                    |     |         |         |         |                     |
| [emIm][AcO]                              | 143314-17-4 |                        |                    |     |         |         |         |                     |
| [emIm][TFA]                              | 174899-65-1 |                        |                    |     |         |         |         |                     |
| [emIm][OTf]                              | 145022-44-2 | RENSIN <sup>7</sup>    | Pbca               | 8   | 10.183  | 12.384  | 18.294  | 90.00               |
| [emIm][TFES]                             | 880084-63-9 | POYLIZ <sup>8</sup>    | P2 <sub>1</sub> /n | 4   | 8.770   | 9.766   | 14.282  | 95.36               |
| [emIm][OTs]                              | 328090-25-1 | UYUJUV02 <sup>9</sup>  | P2 <sub>1</sub> /c | 8   | 8.958   | 30.874  | 10.112  | 90.94               |
| [emIm][Me <sub>2</sub> PO <sub>4</sub> ] | 945611-27-8 | COVLAD <sup>10</sup>   | P-1                | 2   | 7.632   | 8.640   | 10.028  | 100.43 <sup>a</sup> |
| [emIm][Et <sub>2</sub> PO <sub>4</sub> ] | 848641-69-0 |                        |                    |     |         |         |         |                     |
| [emIm][Bu <sub>2</sub> PO <sub>4</sub> ] | 869858-84-4 |                        |                    |     |         |         |         |                     |
| [emIm][NTf <sub>2</sub> ]                | 174899-82-2 | RENSEJ01 <sup>11</sup> | Pna2 <sub>1</sub>  | 8   | 27.713  | 7.0343  | 15.769  | 90.00               |

<sup>a</sup>  $\alpha=91.62^\circ$ ,  $\gamma=111.94^\circ$ .

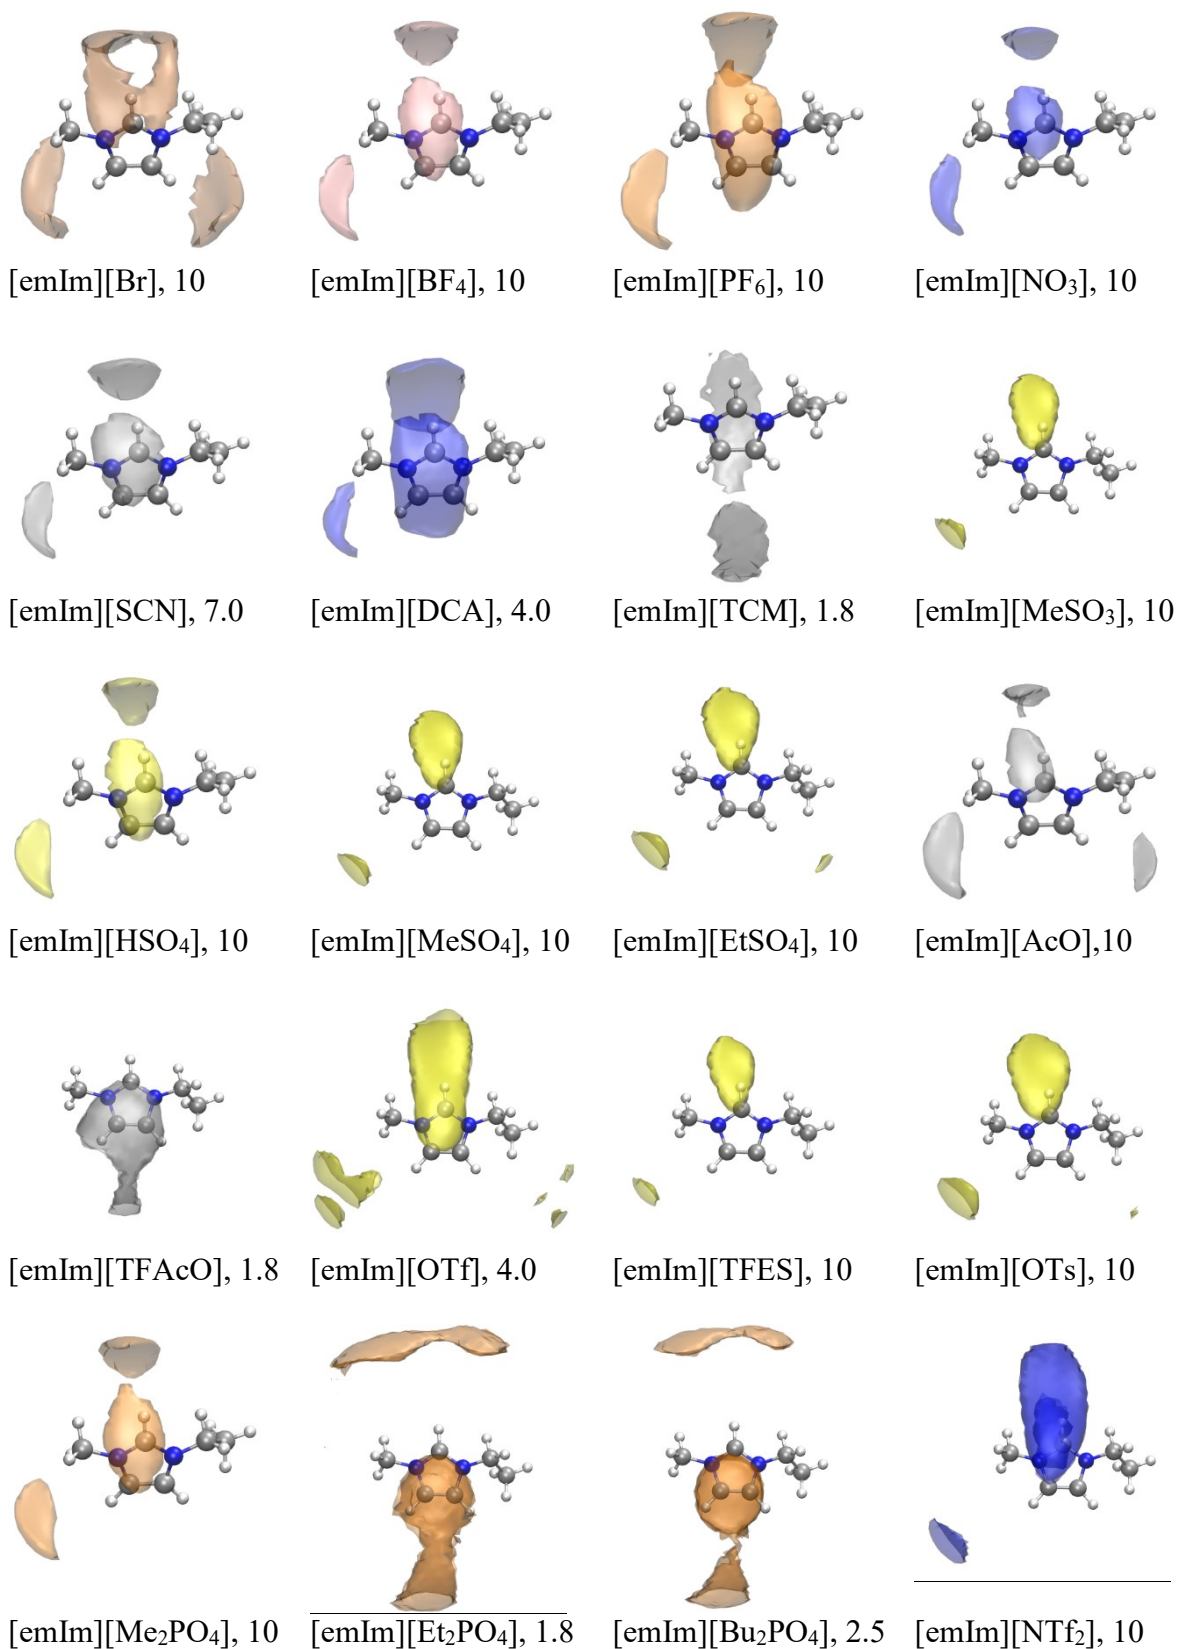

**FIGURE S1.** Contours of the spatial distribution functions (SDF) of anionic central atoms around the [emIm] cation, corresponding to the given SDF values.

**TABLE S3**

Overview of the calculated structural parameters used for data interpretations and correlations. The following parameters are given: position of the first peak of the cation-anion radial distribution function  $d_{\text{int}}$ , intensity of the first RDF peak  $g_{\text{RDF}}^{\text{max}}$ , integral coordination numbers  $n_{\text{coord}}^{\text{CR}}$  and  $n_{\text{coord}}^{\text{CW}}$  of cation-anion CR-X and CW-X contacts, molar volume at 400 K, isobaric thermal expansivity coefficient  $\alpha_p$ , and cohesive energy density  $E_\rho$ .

| Ionic liquid                             | $d_{\text{int}}, \text{\AA}$ | $g_{\text{RDF}}^{\text{max}}$ | $n_{\text{coord}}^{\text{CR}}$ | $n_{\text{coord}}^{\text{CW}}$ | $V_m, \text{cm}^3 \text{mol}^{-1}$ | $\alpha_p, \text{MK}^{-1}$ | $-E_\rho, \text{kJ cm}^{-3}$ |
|------------------------------------------|------------------------------|-------------------------------|--------------------------------|--------------------------------|------------------------------------|----------------------------|------------------------------|
| [emIm][Br]                               | 3.60                         | 3.23                          | 1.63                           | 1.40                           | 137.9                              | 430.2                      | 1.40                         |
| [emIm][BF <sub>4</sub> ]                 | 3.29                         | 1.77                          | 3.90                           | 3.02                           | 166.8                              | 510.8                      | 1.00                         |
| [emIm][PF <sub>6</sub> ]                 | 3.34                         | 1.56                          | 4.96                           | 1.17                           | 188.4                              | 510.9                      | 0.92                         |
| [emIm][NO <sub>3</sub> ]                 | 3.22                         | 2.06                          | 3.33                           | 2.60                           | 143.9                              | 416.5                      | 1.25                         |
| [emIm][SCN]                              | 3.37                         | 2.25                          | 1.36                           | 1.11                           | 156.2                              | 453.9                      | 1.11                         |
| [emIm][DCA]                              | 3.53                         | 1.45                          | 1.36                           | 2.14                           | 170.1                              | 517.4                      | 0.93                         |
| [emIm][TCM]                              | 3.39                         | 2.09                          | 3.08                           | 3.40                           | 198.0                              | 580.2                      | 0.78                         |
| [emIm][MeSO <sub>3</sub> ]               | 3.34                         | 2.18                          | 3.08                           | 2.38                           | 179.0                              | 436.3                      | 0.93                         |
| [emIm][HSO <sub>4</sub> ]                | 3.40                         | 1.5                           | 0.88                           | 0.69                           | 162.8                              | 446.9                      | 1.20                         |
| [emIm][MeSO <sub>4</sub> ]               | 3.35                         | 2.15                          | 3.12                           | 2.32                           | 184.3                              | 421.2                      | 1.00                         |
| [emIm][EtSO <sub>4</sub> ]               | 3.35                         | 1.87                          | 2.44                           | 2.25                           | 202.0                              | 424.6                      | 0.93                         |
| [emIm][AcO]                              | 3.26                         | 2.46                          | 2.13                           | 1.56                           | 160.8                              | 424.4                      | 1.08                         |
| [emIm][TFA]                              | 3.27                         | 2.51                          | 2.07                           | 1.22                           | 178.9                              | 497.5                      | 0.92                         |
| [emIm][OTf]                              | 3.41                         | 3.04                          | 3.13                           | 2.48                           | 198.7                              | 450.5                      | 0.82                         |
| [emIm][TFES]                             | 3.28                         | 2.25                          | 2.71                           | 2.09                           | 215.5                              | 507.6                      | 0.77                         |
| [emIm][OTs]                              | 3.35                         | 2.74                          | 2.87                           | 2.12                           | 247.2                              | 415.5                      | 0.76                         |
| [emIm][Me <sub>2</sub> PO <sub>4</sub> ] | 3.32                         | 2.64                          | 2.00                           | 1.42                           | 209.0                              | 481.9                      | 0.80                         |
| [emIm][Et <sub>2</sub> PO <sub>4</sub> ] | 3.32                         | 3.21                          | 1.99                           | 1.41                           | 245.0                              | 503.2                      | 0.73                         |
| [emIm][Bu <sub>2</sub> PO <sub>4</sub> ] | 3.31                         | 4.34                          | 1.93                           | 1.42                           | 320.6                              | 565.4                      | 0.59                         |
| [emIm][NTf <sub>2</sub> ]                | 3.32                         | 2.03                          | 3.01                           | 2.83                           | 260.6                              | 523.9                      | 0.62                         |

**TABLE S4**

Overview of the original experimental studies used in this work to derive the reference experimental density and isobaric thermal expansivity, both at the standard pressure.

| Reference                      | Data points | Temperature range, K | Reference                       | Data points | Temperature range, K |
|--------------------------------|-------------|----------------------|---------------------------------|-------------|----------------------|
| [emIm][BF <sub>4</sub> ]       |             |                      | [emIm][NTf <sub>2</sub> ]       |             |                      |
| Seki et al. <sup>12</sup>      | 15          | 283-353              | Součková et al. <sup>13</sup>   | 21          | 261-363              |
| Song et al. <sup>14</sup>      | 11          | 293-343              | Fröba et al. <sup>15</sup>      | 19          | 273-363              |
| Navia et al. <sup>16</sup>     | 9           | 298-308              | Rocha et al. <sup>17</sup>      | 17          | 278-358              |
| Watanabe et al. <sup>18</sup>  | 9           | 293-363              | Zorębski et al. <sup>19</sup>   | 17          | 293-363              |
| Montalbán et al. <sup>20</sup> | 6           | 293.343              | Seoane et al. <sup>21</sup>     | 11          | 293-343              |
| Currás et al. <sup>22</sup>    | 5           | 293-333              | Khalil et al. <sup>23</sup>     | 9           | 293-333              |
| Bhagour et al. <sup>24</sup>   | 4           | 293-308              | Dzida et al. <sup>25</sup>      | 8           | 278-363              |
| Gupta et al. <sup>26</sup>     | 4           | 293-308              | Safarov et al. <sup>27</sup>    | 7           | 283-363              |
| Rao et al. <sup>28</sup>       | 4           | 293-323              | Song et al. <sup>29</sup>       | 7           | 283-333              |
| Sharma <sup>30</sup>           | 4           | 293-308              | Yao et al. <sup>31</sup>        | 7           | 293-323              |
| [emIm][MeSO <sub>4</sub> ]     |             |                      | Montalbán et al. <sup>20</sup>  | 7           | 293-343              |
| Costa et al. <sup>32</sup>     | 71          | 293-363              | Tokuda et al. <sup>33</sup>     | 7           | 288-313              |
| Tomé et al. <sup>34</sup>      | 8           | 293-393              | Anwar et al. <sup>35</sup>      | 6           | 298-323              |
| Ficke et al. <sup>36</sup>     | 7           | 293-343              | Tokuda et al. <sup>33</sup>     | 7           | 288-313              |
| Tsamba et al. <sup>37</sup>    | 5           | 298-342              | Anwar et al. <sup>35</sup>      | 6           | 298-323              |
| Alkhalidi et al. <sup>38</sup> | 4           | 298-313              | Batista et al. <sup>39</sup>    | 4           | 298-328              |
| Sandhya et al. <sup>40</sup>   | 3           | 298-308              | Salinas et al. <sup>41</sup>    | 4           | 278-338              |
| -                              | -           | -                    | Vuksanovic et al. <sup>42</sup> | 4           | 288-318              |

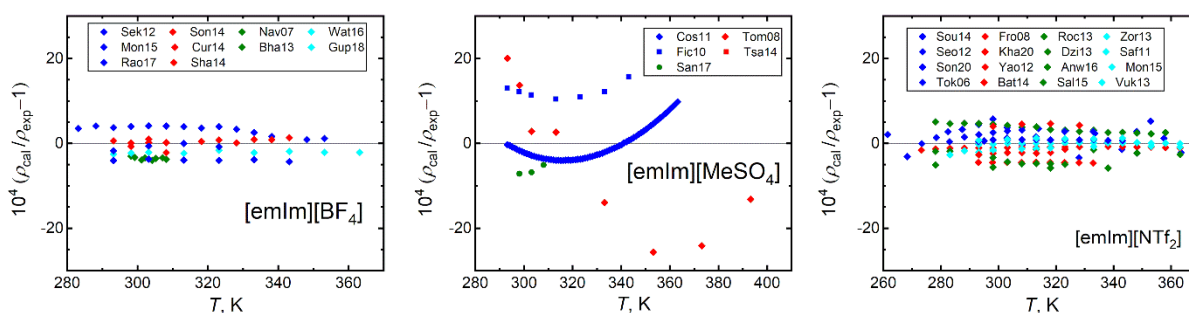

**FIGURE S2.** Deviation plots for selected experimental data sets on liquid phase densities for three ILs, exhibiting mutual consistency with the uncertainties stated with the authors (0.15 % on average)

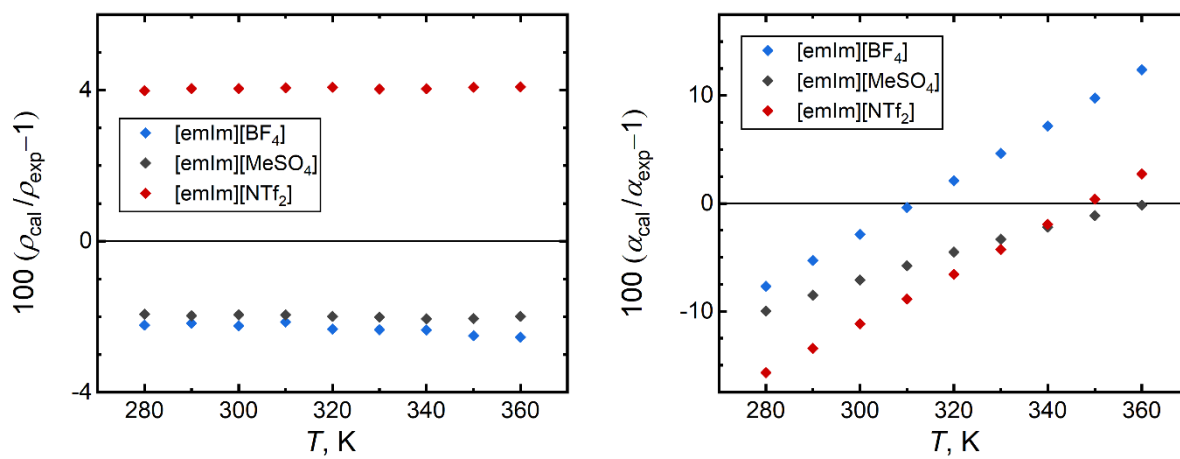

**FIGURE S3.** Relative deviations of densities  $\rho$  and isobaric thermal expansivities  $\alpha$  calculated from the MD simulations using the CL&P force field from the averaged experimental data.

**TABLE S5**

Overview of the calculated energetic parameters used for data interpretations and correlations. The following parameters are given: pair interaction energy  $E_{\text{int}}^{\text{liq}}$  calculated for the closest ion pairs in their average mutual geometry in the liquid phase, pair interaction energy  $E_{\text{int}}^{\text{gas}}$  calculated for an isolated ion pair at the sSAPT0/jun-pVDZ and MP2C-F12/aug-cc-pVDZ levels of theory, Conformational penalty  $\Delta E_{\text{conf}}^{\text{cond}}$  associated with condensation, change of the total energy upon vaporization  $\Delta_{\text{vap}}U$ , relative increase of the contribution of dispersion interactions  $\epsilon_{\text{disp}}$  for the cohesion between liquid and gas phase, curvature  $\kappa$  of the ion pair interaction energy – distance curve at its minimum.

| Ionic liquid   | $-E_{\text{int}}^{\text{liq}}$ ,<br>kJ mol <sup>-1</sup> | $-E_{\text{int,SAPT}}^{\text{gas}}$ ,<br>kJ mol <sup>-1</sup> | $-E_{\text{int,MP2C}}^{\text{gas}}$ ,<br>kJ mol <sup>-1</sup> | $\Delta E_{\text{conf}}^{\text{cond}}$ ,<br>kJ mol <sup>-1</sup> | $\Delta_{\text{vap}}U$ ,<br>kJ mol <sup>-1</sup> | $\frac{\epsilon_{\text{disp}}^{\text{liq}}}{\epsilon_{\text{disp}}^{\text{gas}}}$ | $\epsilon_{\text{disp}}^{\text{liq}}$ | $\kappa$ ,<br>kJ mol <sup>-1</sup> Å <sup>-2</sup> |
|----------------|----------------------------------------------------------|---------------------------------------------------------------|---------------------------------------------------------------|------------------------------------------------------------------|--------------------------------------------------|-----------------------------------------------------------------------------------|---------------------------------------|----------------------------------------------------|
| [emIm][Br]     | 346.0                                                    | 369.6                                                         | 322.2                                                         | 23.6                                                             | 193.7                                            | 3.83                                                                              | 0.25                                  | 296                                                |
| [emIm][BF4]    | 331.3                                                    | 371.5                                                         | 375.0                                                         | 40.1                                                             | 167.4                                            | 5.45                                                                              | 0.30                                  | 355                                                |
| [emIm][PF6]    | 313.3                                                    | 347.3                                                         | 352.4                                                         | 34.0                                                             | 173.4                                            | 5.02                                                                              | 0.32                                  | 313                                                |
| [emIm][NO3]    | 357.2                                                    | 384.4                                                         | 389.2                                                         | 27.2                                                             | 180.1                                            | 5.01                                                                              | 0.37                                  | 389                                                |
| [emIm][SCN]    | 336.5                                                    | 373.0                                                         | 379.6                                                         | 36.5                                                             | 173.2                                            | 3.64                                                                              | 0.33                                  | 284                                                |
| [emIm][DCA]    | 325.8                                                    | 358.7                                                         | 367.5                                                         | 32.9                                                             | 157.6                                            | 3.57                                                                              | 0.38                                  | 215                                                |
| [emIm][TCM]    | 271.5                                                    | 345.1                                                         | 351.0                                                         | 73.7                                                             | 154.2                                            | 4.16                                                                              | 0.37                                  | 190                                                |
| [emIm][MeSO3]  | 365.0                                                    | 413.5                                                         | 411.1                                                         | 48.5                                                             | 166.9                                            | 5.20                                                                              | 0.43                                  | 425                                                |
| [emIm][HSO4]   | 350.0                                                    | 387.8                                                         | 394.0                                                         | 37.8                                                             | 195.4                                            | 4.75                                                                              | 0.38                                  | 368                                                |
| [emIm][MeSO4]  | 392.5                                                    | 394.5                                                         | 396.2                                                         | 42.5                                                             | 183.7                                            | 4.77                                                                              | 0.42                                  | 337                                                |
| [emIm][EtSO4]  | 352.2                                                    | 395.1                                                         | 398.3                                                         | 42.9                                                             | 187.6                                            | 5.66                                                                              | 0.44                                  | 354                                                |
| [emIm][AcO]    | 408.1                                                    | 450.7                                                         | 437.6                                                         | 42.6                                                             | 173.5                                            | 5.88                                                                              | 0.40                                  | 476                                                |
| [emIm][TFA]    | 349.8                                                    | 392.2                                                         | 389.0                                                         | 42.4                                                             | 163.9                                            | 4.74                                                                              | 0.40                                  | 314                                                |
| [emIm][OTf]    | 330.5                                                    | 364.2                                                         | 370.6                                                         | 33.8                                                             | 162.6                                            | 5.12                                                                              | 0.43                                  | 344                                                |
| [emIm][TFES]   | 324.0                                                    | 362.2                                                         | 367.0                                                         | 38.2                                                             | 165.2                                            | 4.15                                                                              | 0.43                                  | 298                                                |
| [emIm][OTs]    | 357.0                                                    | 407.9                                                         | 402.2                                                         | 50.9                                                             | 187.4                                            | 4.85                                                                              | 0.52                                  | 419                                                |
| [emIm][Me2PO4] | 382.0                                                    | 429.4                                                         | 422.9                                                         | 47.4                                                             | 168.2                                            | 5.32                                                                              | 0.43                                  | 459                                                |
| [emIm][Et2PO4] | 351.4                                                    | 432.4                                                         | 424.4                                                         | 81.1                                                             | 177.9                                            | 5.03                                                                              | 0.45                                  | 494                                                |
| [emIm][Bu2PO4] | 358.4                                                    | 432.3                                                         | 425.9                                                         | 73.9                                                             | 188.8                                            | 3.93                                                                              | 0.50                                  | 382                                                |
| [emIm][NTf2]   | 316.3                                                    | 355.7                                                         | 358.4                                                         | 39.4                                                             | 162.2                                            | 4.97                                                                              | 0.53                                  | 333                                                |

**TABLE S6**

Overview of the calculated diffusion parameters used for data interpretations and correlations. The following parameters are given: cationic self-diffusivity  $D_{\text{cat}}$ , anionic self-diffusivity  $D_{\text{ani}}$ , activation energy for the diffusion of the ion pair  $E_{\text{A}}^{\text{dif}}$ , all at 400 K.

| Ionic liquid                             | $-\log(D_{\text{cat}})$ | $-\log(D_{\text{ani}})$ | $E_{\text{A}}^{\text{dif}}$ , kJ mol <sup>-1</sup> |
|------------------------------------------|-------------------------|-------------------------|----------------------------------------------------|
| [emIm][Br]                               | 10.76                   | 10.96                   | 43.40                                              |
| [emIm][BF <sub>4</sub> ]                 | 9.87                    | 10.12                   | 24.61                                              |
| [emIm][PF <sub>6</sub> ]                 | 10.26                   | 10.54                   | 34.06                                              |
| [emIm][NO <sub>3</sub> ]                 | 10.22                   | 10.37                   | 26.18                                              |
| [emIm][SCN]                              | 9.88                    | 9.94                    | 29.06                                              |
| [emIm][DCA]                              | 9.63                    | 9.58                    | 17.68                                              |
| [emIm][TCM]                              | 9.59                    | 9.56                    | 17.70                                              |
| [emIm][MeSO <sub>3</sub> ]               | 10.14                   | 10.40                   | 32.73                                              |
| [emIm][HSO <sub>4</sub> ]                | 10.36                   | 10.44                   | 39.93                                              |
| [emIm][MeSO <sub>4</sub> ]               | 10.09                   | 10.39                   | 26.85                                              |
| [emIm][EtSO <sub>4</sub> ]               | 10.20                   | 10.55                   | 29.56                                              |
| [emIm][AcO]                              | 10.09                   | 10.31                   | 27.37                                              |
| [emIm][TFA]                              | 9.95                    | 10.15                   | 26.89                                              |
| [emIm][OTf]                              | 10.10                   | 10.42                   | 29.47                                              |
| [emIm][TFES]                             | 10.06                   | 10.24                   | 25.25                                              |
| [emIm][OTs]                              | 10.47                   | 10.81                   | 38.40                                              |
| [emIm][Me <sub>2</sub> PO <sub>4</sub> ] | 9.83                    | 10.18                   | 22.97                                              |
| [emIm][Et <sub>2</sub> PO <sub>4</sub> ] | 10.15                   | 10.53                   | 28.33                                              |
| [emIm][Bu <sub>2</sub> PO <sub>4</sub> ] | 10.54                   | 10.79                   | 41.24                                              |
| [emIm][NTf <sub>2</sub> ]                | 9.99                    | 10.19                   | 24.11                                              |



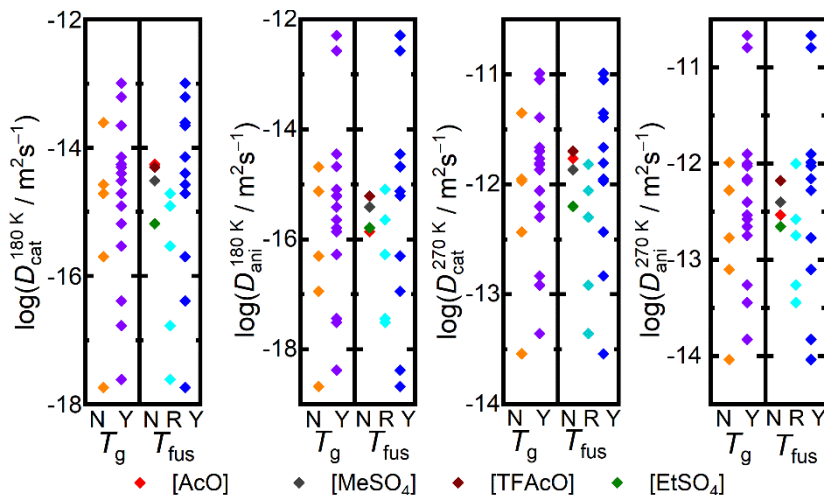

**FIGURE S4.** Comparison of cationic and anionic self-diffusivities ( $D_{\text{cat}}$ ,  $D_{\text{ani}}$ ) of for groups of ionic liquids at 180 K and 270 K sorted upon availability of  $T_g$  (Yes in purple, No in orange) and  $T_{\text{fus}}$  (Yes in blue, Rarely crystallizing in cyan, No marked individually). Left – cationic self-diffusivity  $D_{\text{cat}}$ ; center – anionic self-diffusivity  $D_{\text{ani}}$ ; right – activation energy for the diffusion of the ion pair  $E_A^{\text{dif}}$ .

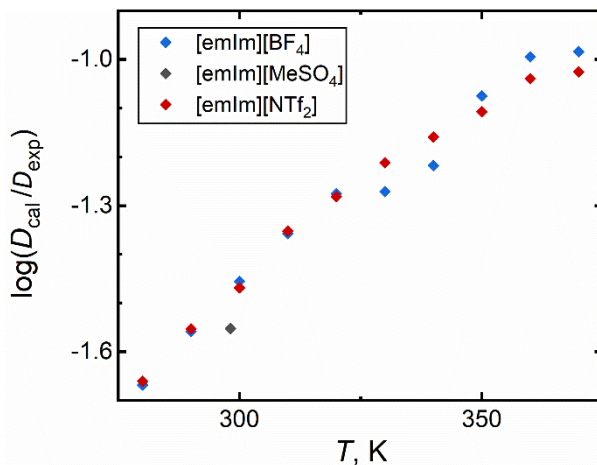

**FIGURE S5.** Logarithmic errors of self-diffusivities of the ion pair  $D$  calculated from the MD simulations using the CL&P force field from the experimental data.

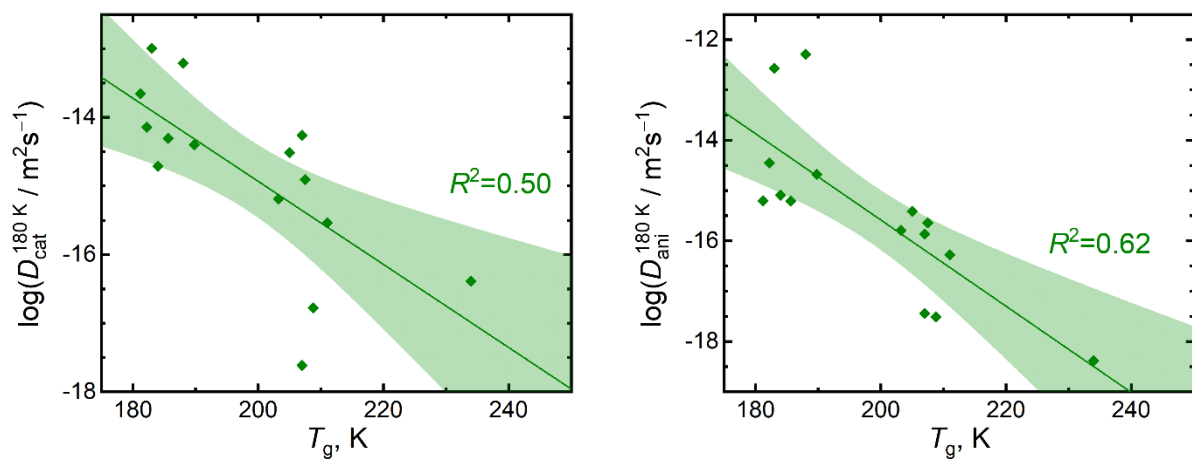

**FIGURE S6.** Correlations of the experimental glass transition temperatures  $T_g$  with the calculated cationic and anionic self-diffusivities  $D_{\text{cat}}$  and  $D_{\text{ani}}$  extrapolated to 180 K, respectively, along with the 95% confidence intervals for the correlation.

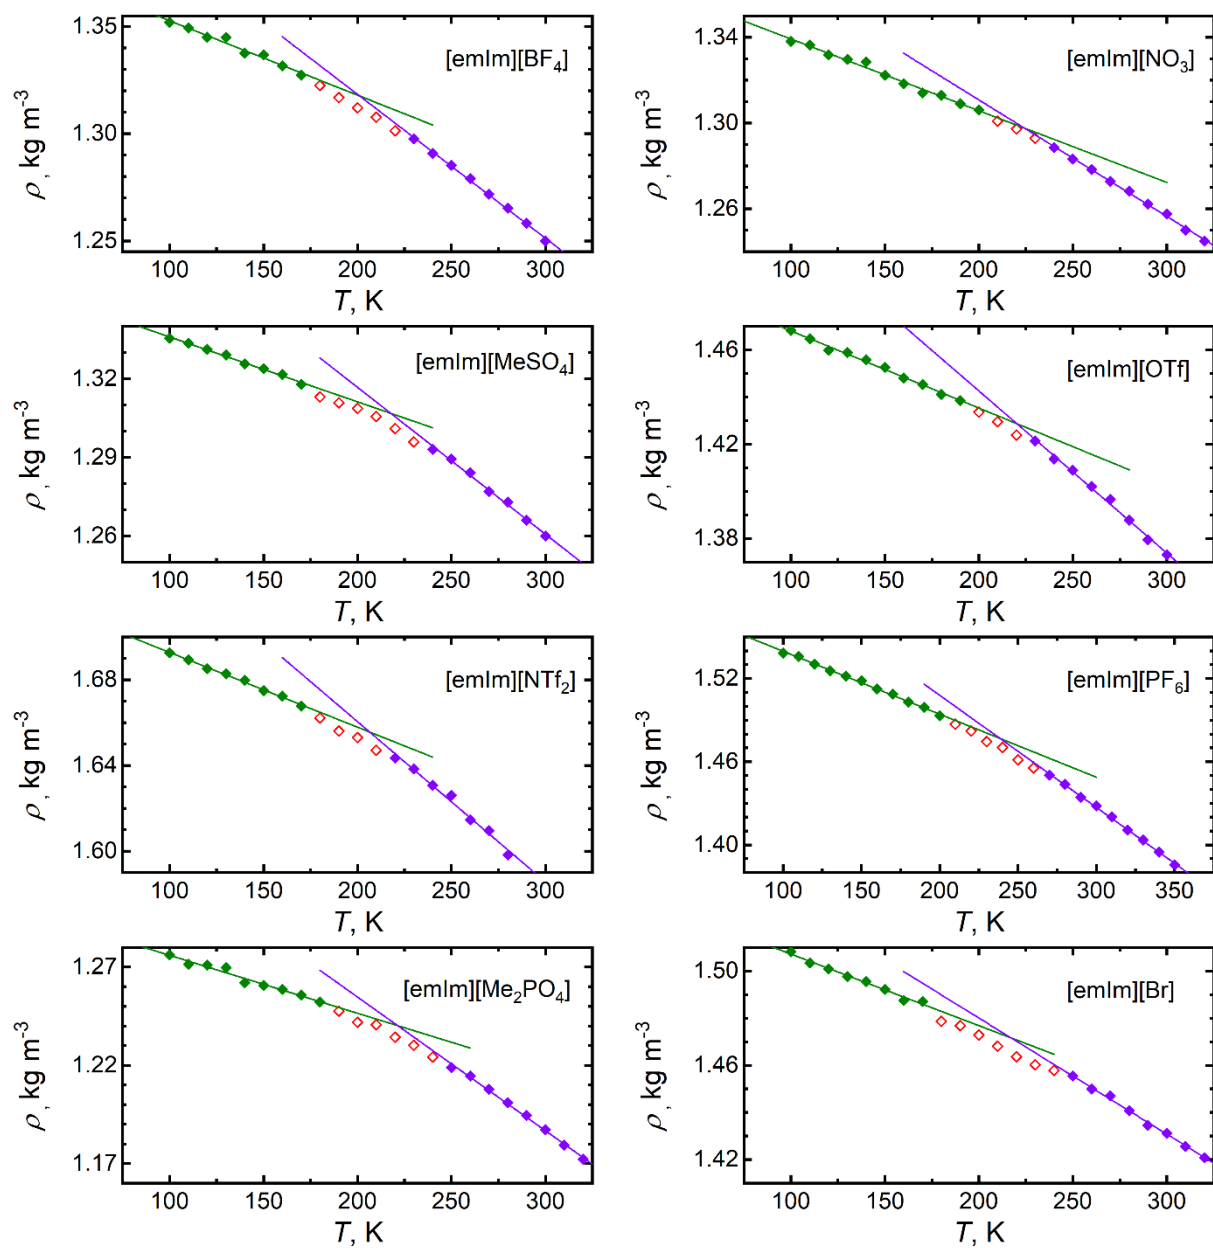

**FIGURE S7.** Illustration of the procedure followed to calculate the  $T_g$  from the temperature-dependent densities obtained from the MD simulations using the CL&P force field. Green and purple points used for extrapolations of the trends of the glassy and liquid phases, respectively. Empty red points were excluded from evaluation of  $T_g$ .

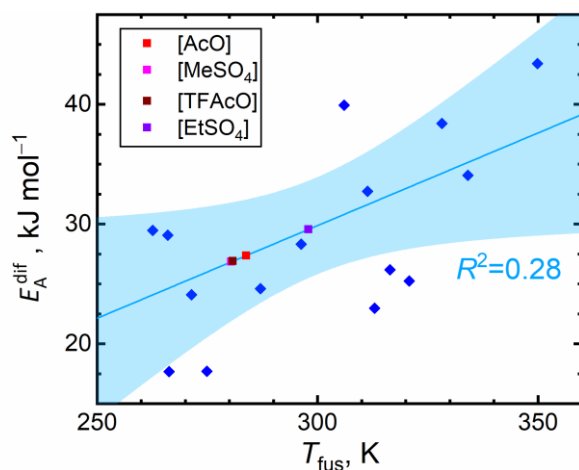

**FIGURE S8.** Correlation of the experimental melting temperatures  $T_{\text{fus}}$  with the activation energy for the diffusion of an ion pair calculated at 400 K along with the 95% confidence intervals for the correlation.

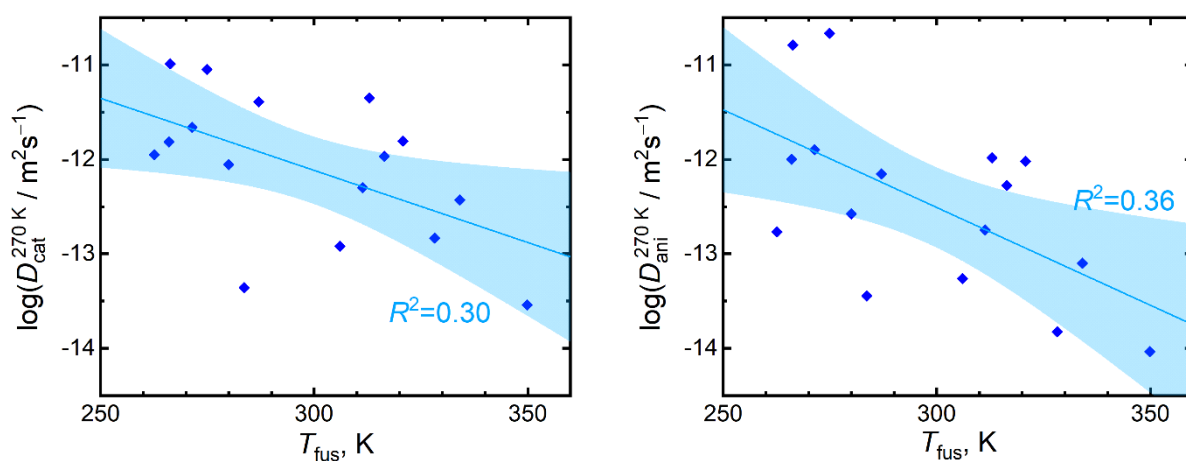

**FIGURE S9.** Correlations of the experimental melting temperatures  $T_{\text{fus}}$  with the calculated cationic and anionic self-diffusivities  $D_{\text{cat}}$  and  $D_{\text{ani}}$  extrapolated to 270 K, respectively, along with the 95% confidence intervals for the correlation.

**TABLE S7**

Overview of the Pearson correlation coefficients  $R$  of various correlations of  $T_g$  or  $T_{fus}$  with properties obtained from molecular dynamics or quantum chemical calculations. The most significant correlations are highlighted with  $R$  values given in bold.

| Correlation                                                 | $T_g$        | $T_{fus}$    | Correlation               | $T_g$        | $T_{fus}$ | Correlation     | $T_g$        | $T_{fus}$    |
|-------------------------------------------------------------|--------------|--------------|---------------------------|--------------|-----------|-----------------|--------------|--------------|
| $E_{int}^{liq}$                                             | -0.56        | -0.36        | $\kappa$                  | <b>+0.67</b> | +0.31     | $\alpha_p$      | -0.56        | -0.45        |
| $E_{int}^{gas}$                                             | <b>-0.68</b> | -0.17        | $d_{int}$                 | -0.09        | +0.02     | $E_\rho$        | +0.05        | -0.39        |
| $\Delta E_{conf}^{cond}$                                    | +0.18        | -0.24        | $\mathcal{G}_{RDF}^{max}$ | +0.38        | +0.04     | $\log(D_{cat})$ | <b>-0.79</b> | <b>-0.64</b> |
| $\Delta_{vap}U$                                             | <b>+0.71</b> | <b>+0.56</b> | $n_{coord}$               | -0.04        | +0.01     | $\log(D_{ani})$ | <b>-0.77</b> | <b>-0.64</b> |
| $\frac{\mathcal{E}_{disp}^{liq}}{\mathcal{E}_{disp}^{gas}}$ | +0.33        | +0.17        | $V_m$                     | +0.29        | -0.20     | $E_A^{dif}$     | <b>+0.72</b> | +0.53        |

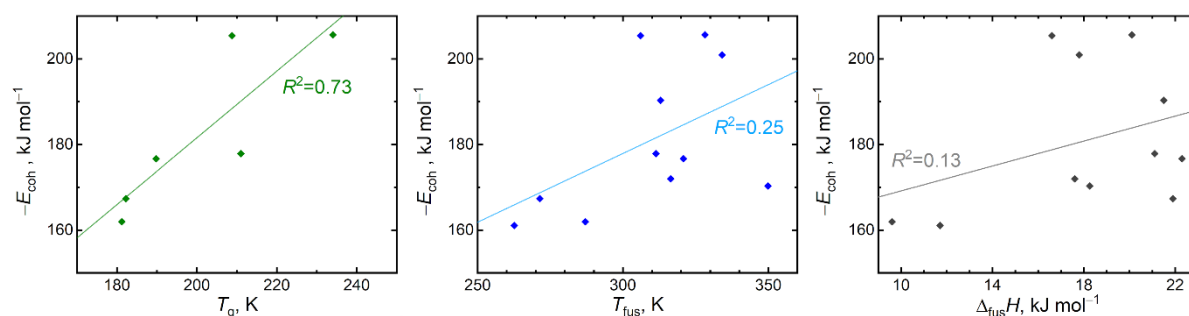

**FIGURE S10.** Correlation of the experimental glass transition temperature  $T_g$ , melting temperatures  $T_{fus}$ , and fusion enthalpy  $\Delta_{fus}H$  with the PBE-D3/PAW cohesive energies of the 11 crystalline ionic liquids with available crystal structures.

**TABLE S8**

Overview of the Pearson correlation coefficients  $R$  of various correlations of  $\Delta_{\text{fus}}H$  with properties obtained from molecular dynamics or quantum chemical calculations.

| Correlation                                                                             | $\Delta_{\text{fus}}H$ | Correlation                             | $\Delta_{\text{fus}}H$ | Correlation                 | $\Delta_{\text{fus}}H$ |
|-----------------------------------------------------------------------------------------|------------------------|-----------------------------------------|------------------------|-----------------------------|------------------------|
| $E_{\text{int}}^{\text{liq}}$                                                           | -0.45                  | $\kappa$                                | +0.35                  | $\alpha_p$                  | -0.02                  |
| $E_{\text{int}}^{\text{gas}}$                                                           | -0.49                  | $d_{\text{int}}$                        | -0.14                  | $E_\rho$                    | +0.31                  |
| $\Delta E_{\text{conf}}^{\text{cond}}$                                                  | +0.12                  | $\mathcal{G}_{\text{RDF}}^{\text{max}}$ | +0.30                  | $\log(D_{\text{cat}})$      | -0.33                  |
| $\Delta_{\text{vap}}U$                                                                  | -0.25                  | $n_{\text{coord}}$                      | -0.33                  | $\log(D_{\text{ani}})$      | -0.33                  |
| $\frac{\mathcal{E}_{\text{disp}}^{\text{liq}}}{\mathcal{E}_{\text{disp}}^{\text{gas}}}$ | -0.18                  | $V_{\text{m}}$                          | +0.49                  | $E_{\text{A}}^{\text{dif}}$ | +0.25                  |

## References for the SI

1. P. M. Dean, B. R. Clare, V. Armel, et al., *Aust. J. Chem.*, 2009, **62**, 334-340.
2. K. Matsumoto, R. Hagiwara, Z. Mazej, et al., *Solid State Sci.*, 2006, **8**, 1250-1257.
3. W. M. Reichert, J. D. Holbrey, R. P. Swatloski, et al., *Cryst. Growth Des.*, 2007, **7**, 1106-1114.
4. J. S. Wilkes and M. J. Zaworotko, *J. Chem. Soc., Chem. Commun.*, 1992, **13**, 965-967.
5. V. Štejfá, J. Rohlíček and C. Červinka, *J. Chem. Thermodyn.*, 2021, 10.1016/j.jct.2021.106392.
6. V. Štejfá, J. Rohlíček and C. Červinka, 2020, 10.5517/ccdc.csd.cc5526pnsc.
7. A. R. Choudhury, N. Winterton, A. Steiner, et al., *CrystEngComm*, 2006, **8**, 742-745.
8. M. A. Harmer, C. P. Junk, V. V. Rostovtsev, et al., *Green Chem.*, 2009, **11**, 517-525.
9. W. Beichel, U. P. Preiss, B. Benkmil, et al., *Z. Anorg. Allg. Chem.*, 2013, **639**, 2153-2161.
10. V. Štejfá, J. Rohlíček and C. Červinka, *J. Chem. Thermodyn.*, 2020, **142**, 106020.
11. Y. U. Paulechka, G. J. Kabo, A. V. Blokhin, et al., *J. Phys. Chem. B*, 2009, **113**, 9538-9546.
12. S. Seki, S. Tsuzuki, K. Hayamizu, et al., *J. Chem. Eng. Data*, 2012, **57**, 2211-2216.
13. M. Součková, J. Klomfar and J. Pátek, *J. Chem. Thermodyn.*, 2014, **77**, 31-39.
14. D. Song and J. Chen, *J. Chem. Eng. Data*, 2014, **59**, 257-262.
15. A. P. Fröba, H. Kremer and A. Leipertz, *J. Phys. Chem. B*, 2008, **112**, 12420-12430.
16. P. Navia, J. Troncoso and L. Romani, *J. Chem. Eng. Data*, 2007, **52**, 1369-1374.
17. M. A. A. Rocha, C. M. S. S. Neves, M. G. Freire, et al., *J. Phys. Chem. B*, 2013, **117**, 10889-10897.
18. M. Watanabe, D. Kodama, T. Makino, et al., *Fluid Ph. Equilibr.*, 2016, **420**, 44-49.
19. E. Zorębski, M. Geppert-Rybczyńska and M. Zorębski, *J. Phys. Chem. B*, 2013, **117**, 3867-3876.
20. M. G. Montalbán, C. L. Bolívar, F. G. Díaz Baños, et al., *J. Chem. Eng. Data*, 2015, **60**, 1986-1996.
21. R. G. Seoane, S. Corderí, E. Gómez, et al., *Ind. Eng. Chem. Res.*, 2012, **51**, 2492-2504.
22. M. R. Currás, P. Husson, A. A. H. Pádua, et al., *Ind. Eng. Chem. Res.*, 2014, **53**, 10791-10802.
23. R. Khalil, N. Chaabene, M. Azar, et al., *Fluid Ph. Equilibr.*, 2020, **503**, 112316.
24. S. Bhagour, S. Solanki, N. Hooda, et al., *J. Chem. Thermodyn.*, 2013, **60**, 76-86.
25. M. Dzida, M. Chorążewski, M. Geppert-Rybczyńska, et al., *J. Chem. Eng. Data*, 2013, **58**, 1571-1576.
26. H. Gupta, S. Malik, M. Chandrasekhar, et al., *J. Therm. Anal. Calorim.*, 2018, **131**, 1653-1669.
27. J. Safarov, W. A. El-Awady, A. Shahverdiyev, et al., *J. Chem. Eng. Data*, 2011, **56**, 106-112.
28. V. S. Rao, T. V. Krishna, T. M. Mohan, et al., *J. Chem. Thermodyn.*, 2017, **104**, 150-161.
29. T. Song, M. J. Lubben and J. F. Brennecke, *Fluid Ph. Equilibr.*, 2020, **504**, 112334.
30. V. K. Sharma, S. Solanki and S. Bhagour, *J. Chem. Eng. Data*, 2014, **59**, 1140-1157.

31. H. Yao, S. Zhang, J. Wang, et al., *J. Chem. Eng. Data*, 2012, **57**, 875-881.
32. A. J. L. Costa, J. M. S. S. Esperança, I. M. Marrucho, et al., *J. Chem. Eng. Data*, 2011, **56**, 3433-3441.
33. H. Tokuda, S. Tsuzuki, M. A. B. H. Susan, et al., *J. Phys. Chem. B*, 2006, **110**, 19593-19600.
34. L. I. N. Tomé, P. J. Carvalho, M. G. Freire, et al., *J. Chem. Eng. Data*, 2008, **53**, 1914-1921.
35. N. Anwar, Riyazuddeen and S. Yasmeen, *J. Mol. Liq.*, 2016, **224**, 189-200.
36. L. E. Ficke, R. R. Novak and J. F. Brennecke, *J. Chem. Eng. Data*, 2010, **55**, 4946-4950.
37. B. E. M. Tsamba, S. Sarraute, M. Traïkia, et al., *J. Chem. Eng. Data*, 2014, **59**, 1747-1754.
38. K. H. A. E. Alkhalidi, A. S. Al-Jimaz and M. S. AlTuwaim, *J. Chem. Thermodyn.*, 2017, **110**, 175-185.
39. M. L. S. Batista, L. I. N. Tomé, C. M. S. S. Neves, et al., *J. Mol. Liq.*, 2014, **192**, 26-31.
40. M. S. Sandhya, V. Govinda, I. Bahadur, et al., *J. Mol. Liq.*, 2017, **240**, 613-621.
41. R. Salinas, J. Pla-Franco, E. Lladosa, et al., *J. Chem. Eng. Data*, 2015, **60**, 525-540.
42. J. M. Vuksanovic, M. S. Calado, G. R. Ivanis, et al., *Fluid Ph. Equilibr.*, 2013, **352**, 100-109.
